# Supplementary material
Source: PubMed Central journal article supplement (PMC5619955)

## Supplemental Appendix

**eTable 1.** Kaplan-Meier cumulative incidence for drop-out over the 7-year study period, by treatment and level of eGFR

**eTable 2.** Absolute incidence rates for the secondary and tertiary clinical composite endpoints, by level of eGFR

**eTable 3.** Unadjusted and adjusted hazard ratios comparing combination therapy with monotherapy for adverse safety events of special interest, at prespecified eGFR values

**eTable 4.** Summary changes of eGFR over 7-year follow-up, on-treatment

**eFigure 1.** A histogram with an overlying normal distribution bell-curve showing the distribution of eGFR at the time of qualifying event for individuals in IMPROVE-IT (N=18,015)

**eFigure 2.** Kaplan-Meier curves for drop-out during the overall 7-year study period, stratified by: a) eGFR  $\geq 90$  mL/min/1.73m<sup>2</sup>; b) eGFR 60–89 mL/min/1.73m<sup>2</sup>; c) eGFR 45–59 mL/min/1.73m<sup>2</sup>; and d) eGFR <45 mL/min/1.73m<sup>2</sup>

**eFigure 3.** Cox proportional hazards models, by eGFR, with respect to the secondary endpoints of (a) all-cause mortality, major coronary events, or nonfatal stroke (p=0.246), and (b) death from cardiovascular disease, nonfatal myocardial infarction, or nonfatal stroke (p=0.067)

**eFigure 4.** On-treatment changes in mean eGFR over the 7-year follow-up period, with corresponding 95% confidence intervals

**eTable 1.** Kaplan-Meier cumulative incidence for drop-out over the 7-year study period, by treatment and level of eGFR

|                                                       | eGFR <45           |                 | eGFR 45–59          |                  | eGFR 60–89          |                  | eGFR ≥90            |                  |
|-------------------------------------------------------|--------------------|-----------------|---------------------|------------------|---------------------|------------------|---------------------|------------------|
|                                                       | S alone<br>(N=532) | Ez/S<br>(N=486) | S alone<br>(N=1359) | Ez/S<br>(N=1384) | S alone<br>(N=4748) | Ez/S<br>(N=4824) | S alone<br>(N=2372) | Ez/S<br>(N=2310) |
| <b>Cumulative Incidence<br/>for Drop-Out (95% CI)</b> |                    |                 |                     |                  |                     |                  |                     |                  |
| <b>Year 1</b>                                         | 2.6 (1.6, 4.4)     | 3.5 (2.2, 5.5)  | 1.9 (1.3, 2.8)      | 2.9 (2.1, 3.9)   | 3.2 (2.7, 3.8)      | 3.2 (2.8, 3.8)   | 2.4 (1.9, 3.1)      | 3.8 (3.1, 4.7)   |
| <b>Year 2</b>                                         | 3.6 (2.3, 5.5)     | 4.3 (2.8, 6.5)  | 3.6 (2.7, 4.7)      | 4.4 (3.5, 5.7)   | 4.5 (4.0, 5.2)      | 4.4 (3.8, 5.0)   | 3.9 (3.2, 4.8)      | 4.8 (4.0, 5.8)   |
| <b>Year 3</b>                                         | 4.3 (2.9, 6.4)     | 4.9 (3.3, 7.3)  | 4.3 (3.4, 5.6)      | 4.9 (3.9, 6.2)   | 5.5 (4.9, 6.2)      | 5.3 (4.7, 6.0)   | 4.8 (4.0, 5.7)      | 5.9 (5.0, 6.9)   |
| <b>Year 4</b>                                         | 4.9 (3.4, 7.1)     | 5.5 (3.8, 8.0)  | 5.1 (4.1, 6.5)      | 5.2 (4.2, 6.6)   | 6.1 (5.5, 6.9)      | 6.1 (5.5, 6.8)   | 5.7 (4.8, 6.7)      | 6.4 (5.5, 7.5)   |
| <b>Year 5</b>                                         | 5.6 (3.9, 8.0)     | 6.7 (4.8, 9.4)  | 5.6 (4.5, 7.0)      | 6.4 (5.2, 7.8)   | 6.6 (5.9, 7.3)      | 6.7 (6.0, 7.4)   | 6.2 (5.3, 7.3)      | 7.0 (6.1, 8.2)   |
| <b>Year 6</b>                                         | 6.5 (4.6, 9.1)     | 7.3 (5.3, 10.2) | 5.6 (4.5, 7.0)      | 6.7 (5.5, 8.2)   | 7.4 (6.7, 8.2)      | 7.1 (6.4, 7.9)   | 7.5 (6.5, 8.7)      | 8.1 (7.0, 9.4)   |
| <b>Year 7</b>                                         | 6.5 (4.6, 9.1)     | 7.7 (5.6, 10.7) | 5.7 (4.6, 7.1)      | 6.9 (5.7, 8.5)   | 8.0 (7.2, 8.8)      | 7.5 (6.8, 8.3)   | 8.2 (7.1, 9.5)      | 8.6 (7.5, 9.9)   |

eGFR = estimated glomerular filtration rate; Ez/S = ezetimibe plus simvastatin; S = simvastatin monotherapy

**eTable 2.** Absolute incidence rates for the secondary and tertiary clinical composite endpoints, by level of eGFR

|                                                                           | Simvastatin monotherapy<br>(N=9011) | Ezetimibe plus simvastatin<br>(N=9004) |
|---------------------------------------------------------------------------|-------------------------------------|----------------------------------------|
| <b>Secondary composite endpoints</b>                                      |                                     |                                        |
| <b>All-cause mortality, major coronary event, or nonfatal stroke</b>      |                                     |                                        |
| eGFR <45 mL/min/1.73m <sup>2</sup>                                        | 296/532 (55.6%)                     | 242/486 (49.8%)                        |
| eGFR 45–59 mL/min/1.73m <sup>2</sup>                                      | 594/1359 (43.7%)                    | 593/1384 (42.8%)                       |
| eGFR 60–89 mL/min/1.73m <sup>2</sup>                                      | 1614/4748 (34.0%)                   | 1557/4824 (32.3%)                      |
| eGFR ≥90 mL/min/1.73m <sup>2</sup>                                        | 723/2372 (30.5%)                    | 683/2310 (29.6%)                       |
| <b>Death from cardiovascular disease, nonfatal MI, or nonfatal stroke</b> |                                     |                                        |
| eGFR <45 mL/min/1.73m <sup>2</sup>                                        | 191/532 (35.9%)                     | 143/486 (29.4%)                        |
| eGFR 45–59 mL/min/1.73m <sup>2</sup>                                      | 349/1359 (25.7%)                    | 313/1384 (22.6%)                       |
| eGFR 60–89 mL/min/1.73m <sup>2</sup>                                      | 792/4748 (16.7%)                    | 764/4824 (15.8%)                       |
| eGFR ≥90 mL/min/1.73m <sup>2</sup>                                        | 362/2372 (15.3%)                    | 320/2310 (13.9%)                       |
| <b>Tertiary composite endpoint</b>                                        |                                     |                                        |
| <b>All-cause mortality</b>                                                |                                     |                                        |
| eGFR <45 mL/min/1.73m <sup>2</sup>                                        | 205/532 (38.5%)                     | 164/486 (33.7%)                        |
| eGFR 45–59 mL/min/1.73m <sup>2</sup>                                      | 286/1359 (21.0%)                    | 299/1384 (21.6%)                       |
| eGFR 60–89 mL/min/1.73m <sup>2</sup>                                      | 540/4748 (11.4%)                    | 564/4824 (11.7%)                       |
| eGFR ≥90 mL/min/1.73m <sup>2</sup>                                        | 189/2372 (8.0%)                     | 183/2310 (7.9%)                        |

Data presented as n/N (%).

eGFR = estimated glomerular filtration rate; MI = myocardial infarction.

**eTable 3.** Unadjusted and adjusted hazard ratios comparing combination therapy with monotherapy for adverse safety events of special interest, at prespecified eGFR values

| Safety Endpoint                                             | Unadjusted Models |                     | Adjusted Models*  |                     |
|-------------------------------------------------------------|-------------------|---------------------|-------------------|---------------------|
|                                                             | HR (95% CI)       | Interaction P-value | HR (95% CI)       | Interaction P-value |
| <b>Gallbladder-related events</b>                           |                   | 0.716               |                   | 0.748               |
| eGFR 45 mL/min/1.73m <sup>2</sup>                           | 0.84 (0.62, 1.13) |                     | 0.84 (0.62, 1.13) |                     |
| eGFR 60 mL/min/1.73m <sup>2</sup>                           | 0.86 (0.71, 1.05) |                     | 0.86 (0.70, 1.05) |                     |
| eGFR 75 mL/min/1.73m <sup>2</sup>                           | 0.88 (0.75, 1.03) |                     | 0.87 (0.75, 1.03) |                     |
| eGFR 90 mL/min/1.73m <sup>2</sup>                           | 0.90 (0.73, 1.11) |                     | 0.89 (0.72, 1.10) |                     |
| eGFR 105 mL/min/1.73m <sup>2</sup>                          | 0.92 (0.67, 1.26) |                     | 0.91 (0.67, 1.25) |                     |
| <b>ALT, AST, or both ≥3x ULN</b>                            |                   | 0.333               |                   | 0.323               |
| eGFR 45 mL/min/1.73m <sup>2</sup>                           | 0.89 (0.63, 1.26) |                     | 0.89 (0.63, 1.26) |                     |
| eGFR 60 mL/min/1.73m <sup>2</sup>                           | 1.11 (0.87, 1.42) |                     | 1.11 (0.87, 1.42) |                     |
| eGFR 75 mL/min/1.73m <sup>2</sup>                           | 1.25 (0.94, 1.67) |                     | 1.26 (0.95, 1.68) |                     |
| eGFR 90 mL/min/1.73m <sup>2</sup>                           | 1.16 (0.91, 1.47) |                     | 1.17 (0.92, 1.49) |                     |
| eGFR 105 mL/min/1.73m <sup>2</sup>                          | 1.07 (0.72, 1.60) |                     | 1.09 (0.74, 1.63) |                     |
| <b>Myopathy, rhabdomyolysis, or myalgia with CK ≥5x ULN</b> |                   | 0.588               |                   | 0.632               |
| eGFR 45 mL/min/1.73m <sup>2</sup>                           | 0.91 (0.51, 1.62) |                     | 0.93 (0.52, 1.66) |                     |
| eGFR 60 mL/min/1.73m <sup>2</sup>                           | 1.08 (0.66, 1.74) |                     | 1.07 (0.66, 1.74) |                     |
| eGFR 75 mL/min/1.73m <sup>2</sup>                           | 1.10 (0.62, 1.94) |                     | 1.08 (0.61, 1.91) |                     |
| eGFR 90 mL/min/1.73m <sup>2</sup>                           | 0.84 (0.51, 1.40) |                     | 0.84 (0.51, 1.40) |                     |
| eGFR 105 mL/min/1.73m <sup>2</sup>                          | 0.66 (0.28, 1.51) |                     | 0.65 (0.28, 1.54) |                     |

\*Adjusted for age, sex, race, weight, diabetes, hypertension, smoking status, baseline Killip class, and baseline medications (beta-blockers, angiotensin-converting enzyme inhibitors or angiotensin-receptor blockers, aspirin, statin therapy) at time of qualifying event.

ALT = alanine aminotransferase; AST = aspartate aminotransferase; CI = confidence interval; CK = creatine kinase; eGFR = estimated glomerular filtration rate; Ez/S = ezetimibe plus simvastatin; HR = hazard ratio; S = simvastatin monotherapy; ULN = upper limit of normal.

**eTable 4.** Summary changes of eGFR over 7-year follow-up, on-treatment.

|                      | Simvastatin monotherapy | Ezetimibe plus simvastatin | Total             |
|----------------------|-------------------------|----------------------------|-------------------|
| Qualifying event (N) | 8799                    | 8793                       | 17592             |
| Mean (SD)            | 76.0 (18.9)             | 75.8 (18.6)                | 75.9 (18.7)       |
| Median (IQR)         | 76.7 (62.7, 90.9)       | 76.3 (62.9, 90.4)          | 76.6 (62.8, 90.6) |
| Year 1 (N)           | 7081                    | 7026                       | 14107             |
| Mean (SD)            | 72.1 (16.6)             | 72.0 (16.8)                | 72.1 (16.7)       |
| Median (IQR)         | 72.4 (61.3, 84.0)       | 72.2 (60.9, 83.9)          | 72.3 (61.1, 84.0) |
| Year 2 (N)           | 6032                    | 6119                       | 12151             |
| Mean (SD)            | 72.4 (16.9)             | 72.1 (16.8)                | 72.2 (16.9)       |
| Median (IQR)         | 72.6 (61.1, 84.6)       | 72.4 (61.1, 84.1)          | 72.5 (61.1, 84.3) |
| Year 3 (N)           | 5454                    | 5527                       | 10981             |
| Mean (SD)            | 72.2 (17.0)             | 72.2 (17.3)                | 72.2 (17.2)       |
| Median (IQR)         | 72.5 (61.0, 84.5)       | 72.4 (60.8, 84.6)          | 72.5 (60.8, 84.6) |
| Year 4 (N)           | 4954                    | 5059                       | 10013             |
| Mean (SD)            | 72.6 (17.6)             | 72.8 (17.6)                | 72.7 (17.6)       |
| Median (IQR)         | 72.8 (61.0, 85.2)       | 73.1 (60.7, 85.7)          | 73.0 (60.9, 85.4) |
| Year 5 (N)           | 3981                    | 4095                       | 8076              |
| Mean (SD)            | 74.4 (18.4)             | 74.6 (18.1)                | 74.5 (18.3)       |
| Median (IQR)         | 75.1 (61.7, 88.4)       | 75.2 (62.3, 88.3)          | 75.2 (62.0, 88.4) |
| Year 6 (N)           | 2967                    | 3039                       | 6006              |
| Mean (SD)            | 75.0 (18.5)             | 75.7 (18.5)                | 75.3 (18.5)       |
| Median (IQR)         | 75.7 (62.6, 89.6)       | 76.4 (63.5, 90.0)          | 76.1 (63.0, 89.7) |
| Year 7 (N)           | 2193                    | 2254                       | 4447              |
| Mean (SD)            | 77.3 (18.5)             | 77.7 (18.9)                | 77.5 (18.7)       |
| Median (IQR)         | 78.5 (64.8, 92.1)       | 79.3 (64.7, 92.9)          | 78.9 (64.7, 92.5) |

IQR = interquartile range; SD = standard deviation

**eFigure 1.** A histogram with an overlying normal distribution bell-curve showing the distribution of eGFR at the time of qualifying event for individuals in IMPROVE-IT (N=18,015)

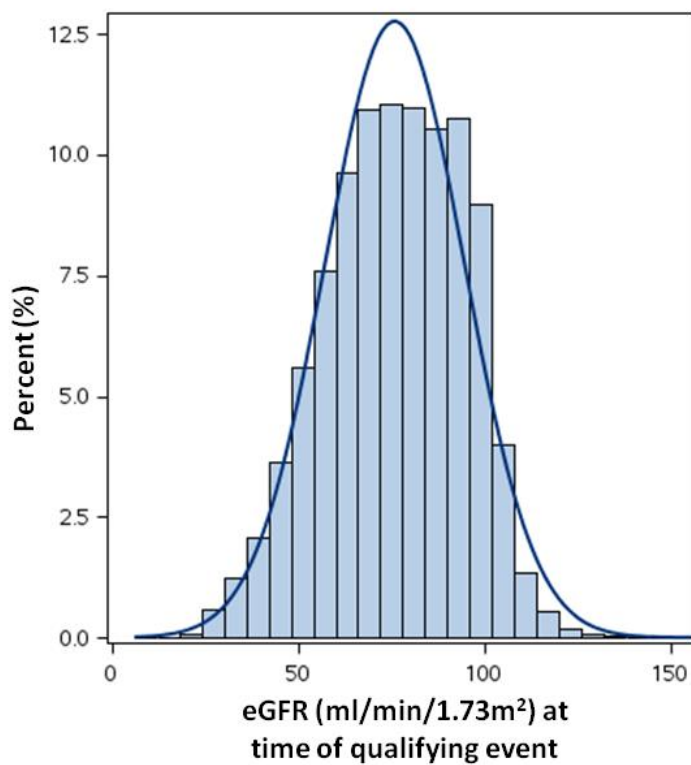

**eFigure 2.** Kaplan-Meier curves for drop-out during the overall 7-year study period, stratified by: a) eGFR  $\geq 90$  mL/min/1.73m<sup>2</sup>; b) eGFR 60–89 mL/min/1.73m<sup>2</sup>; c) eGFR 45–59 mL/min/1.73m<sup>2</sup>; and d) eGFR  $< 45$  mL/min/1.73m<sup>2</sup>

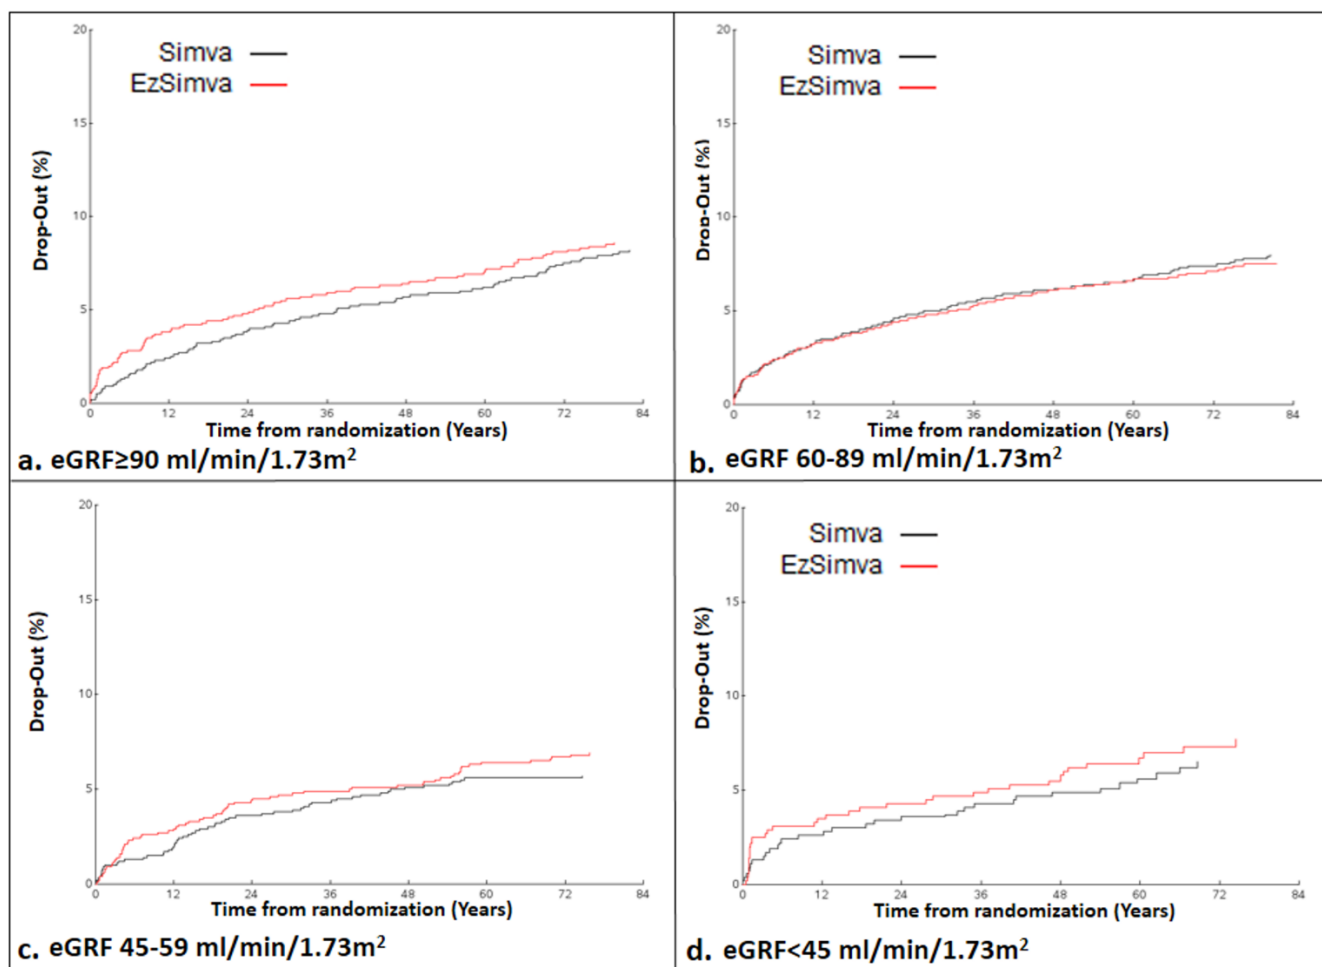

**eFigure 3.** Cox proportional hazards models, by eGFR, with respect to the secondary endpoints of (a) all-cause mortality, major coronary events, or nonfatal stroke ( $p=0.246$ ), and (b) death from cardiovascular disease, nonfatal myocardial infarction, or nonfatal stroke ( $p=0.067$ )

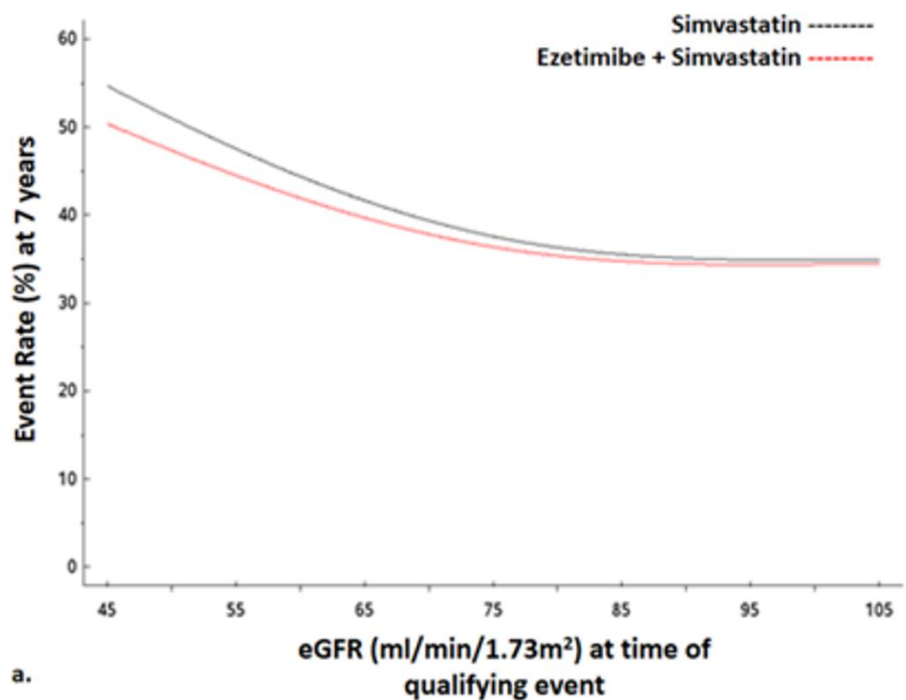

a.

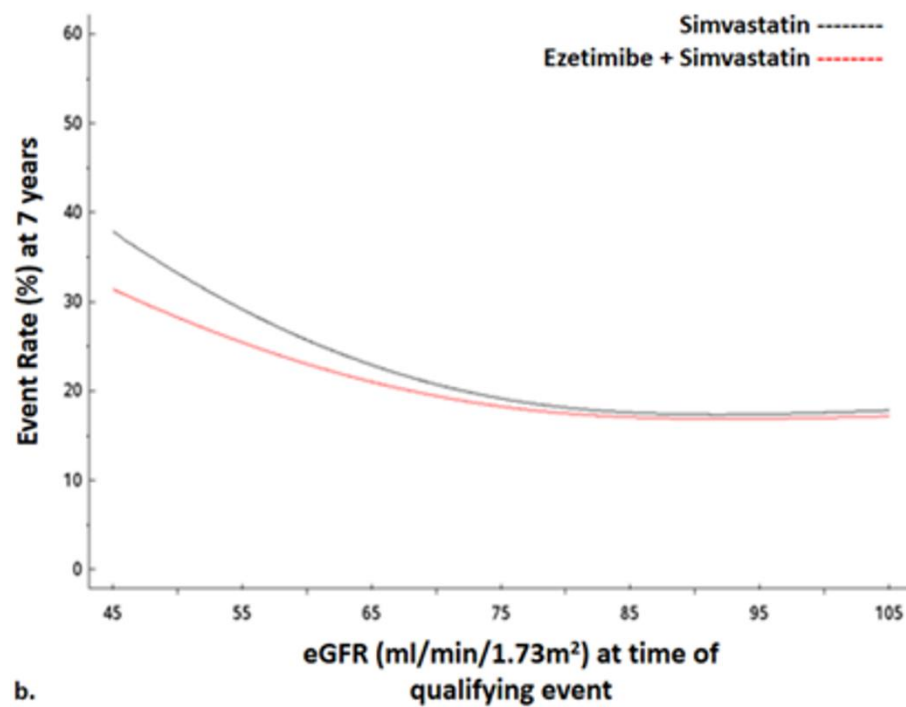

b.



**eFigure 4.** On-treatment changes in mean eGFR over the 7-year follow-up period, with corresponding 95% confidence intervals

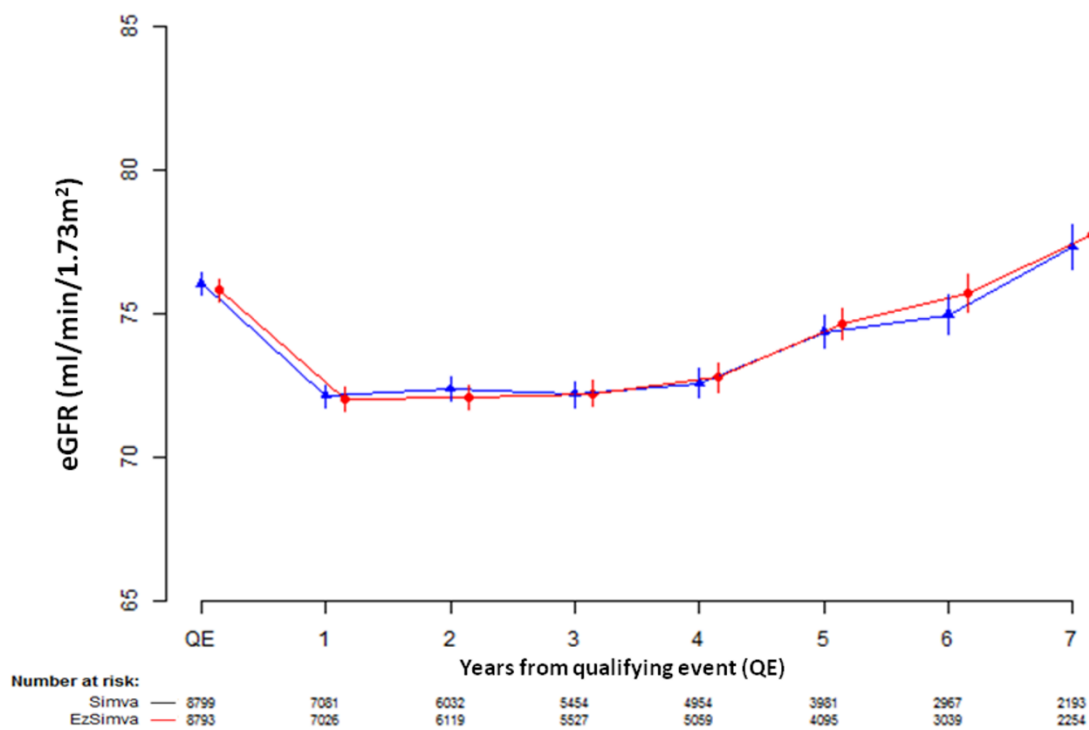

Supplement: ASN.2016090957SupplementaryData.pdf [file ASN.2016090957SupplementaryData.pdf]
